# Supplementary material for: Cultivating epizoic diatoms provides insights into the evolution and ecology of both epibionts and hosts
Source: PubMed Central journal article supplement (PMC9448772; doi:10.1038/s41598-022-19064-0), 2022-09-06

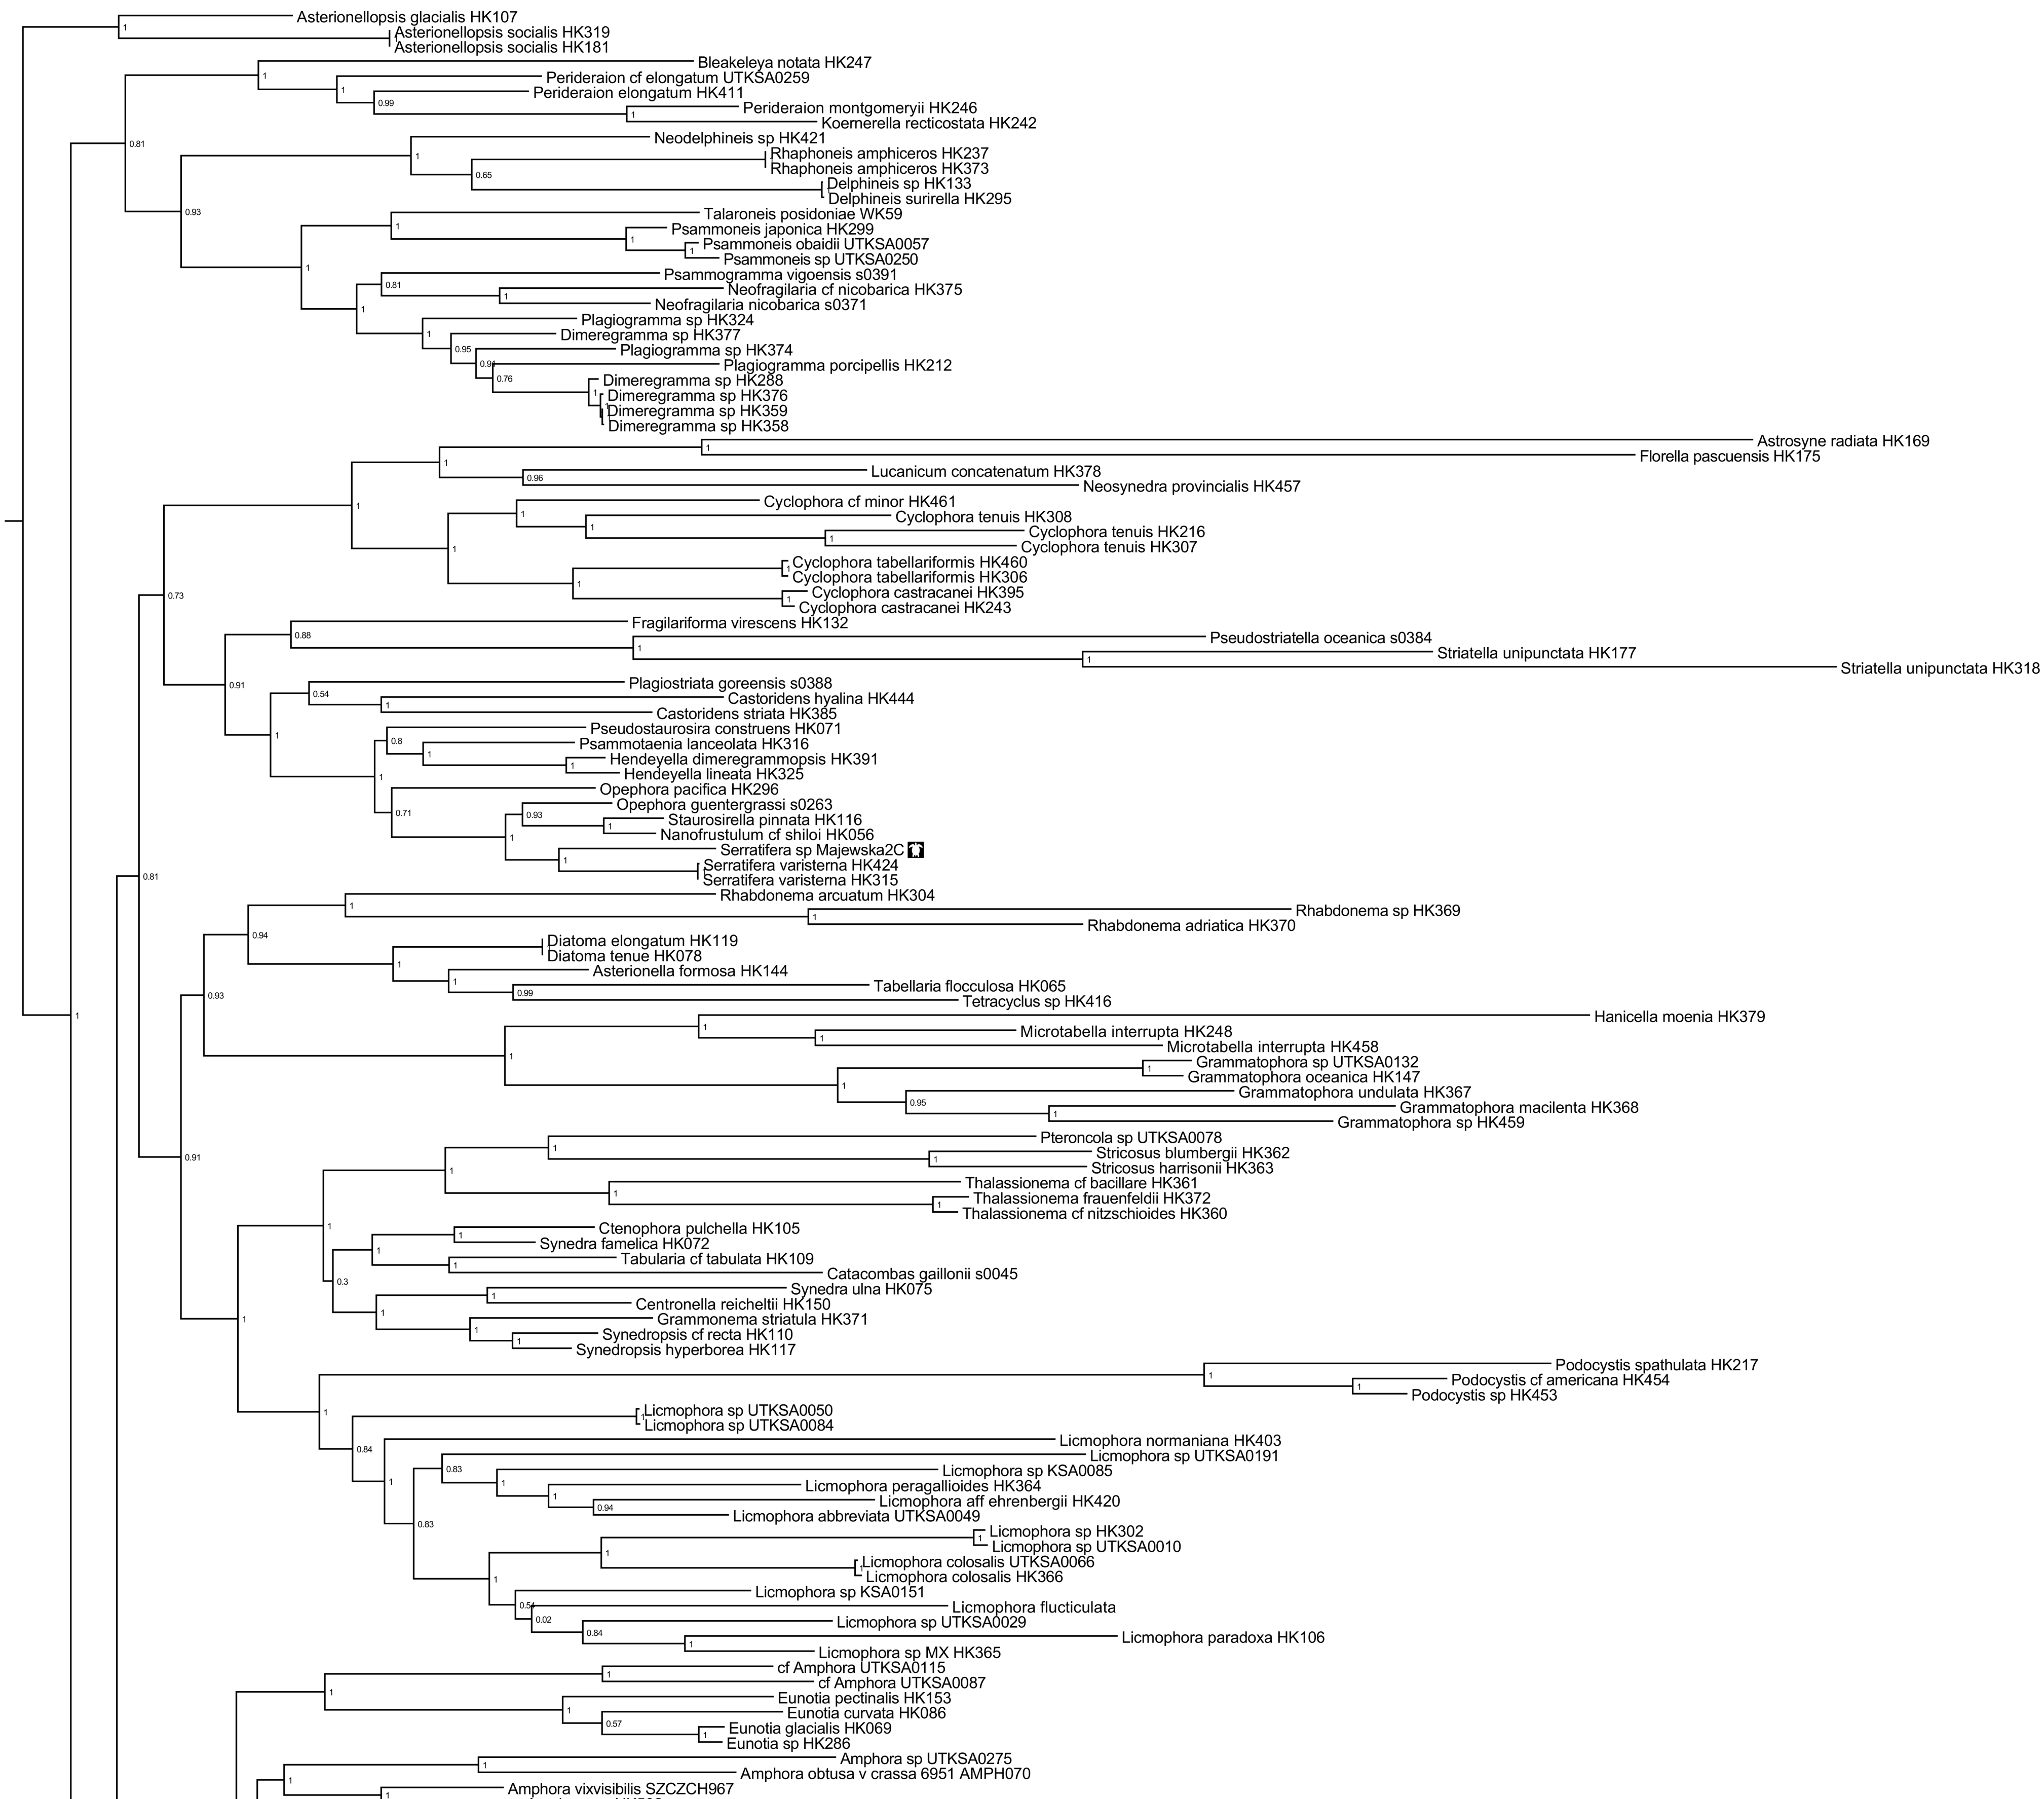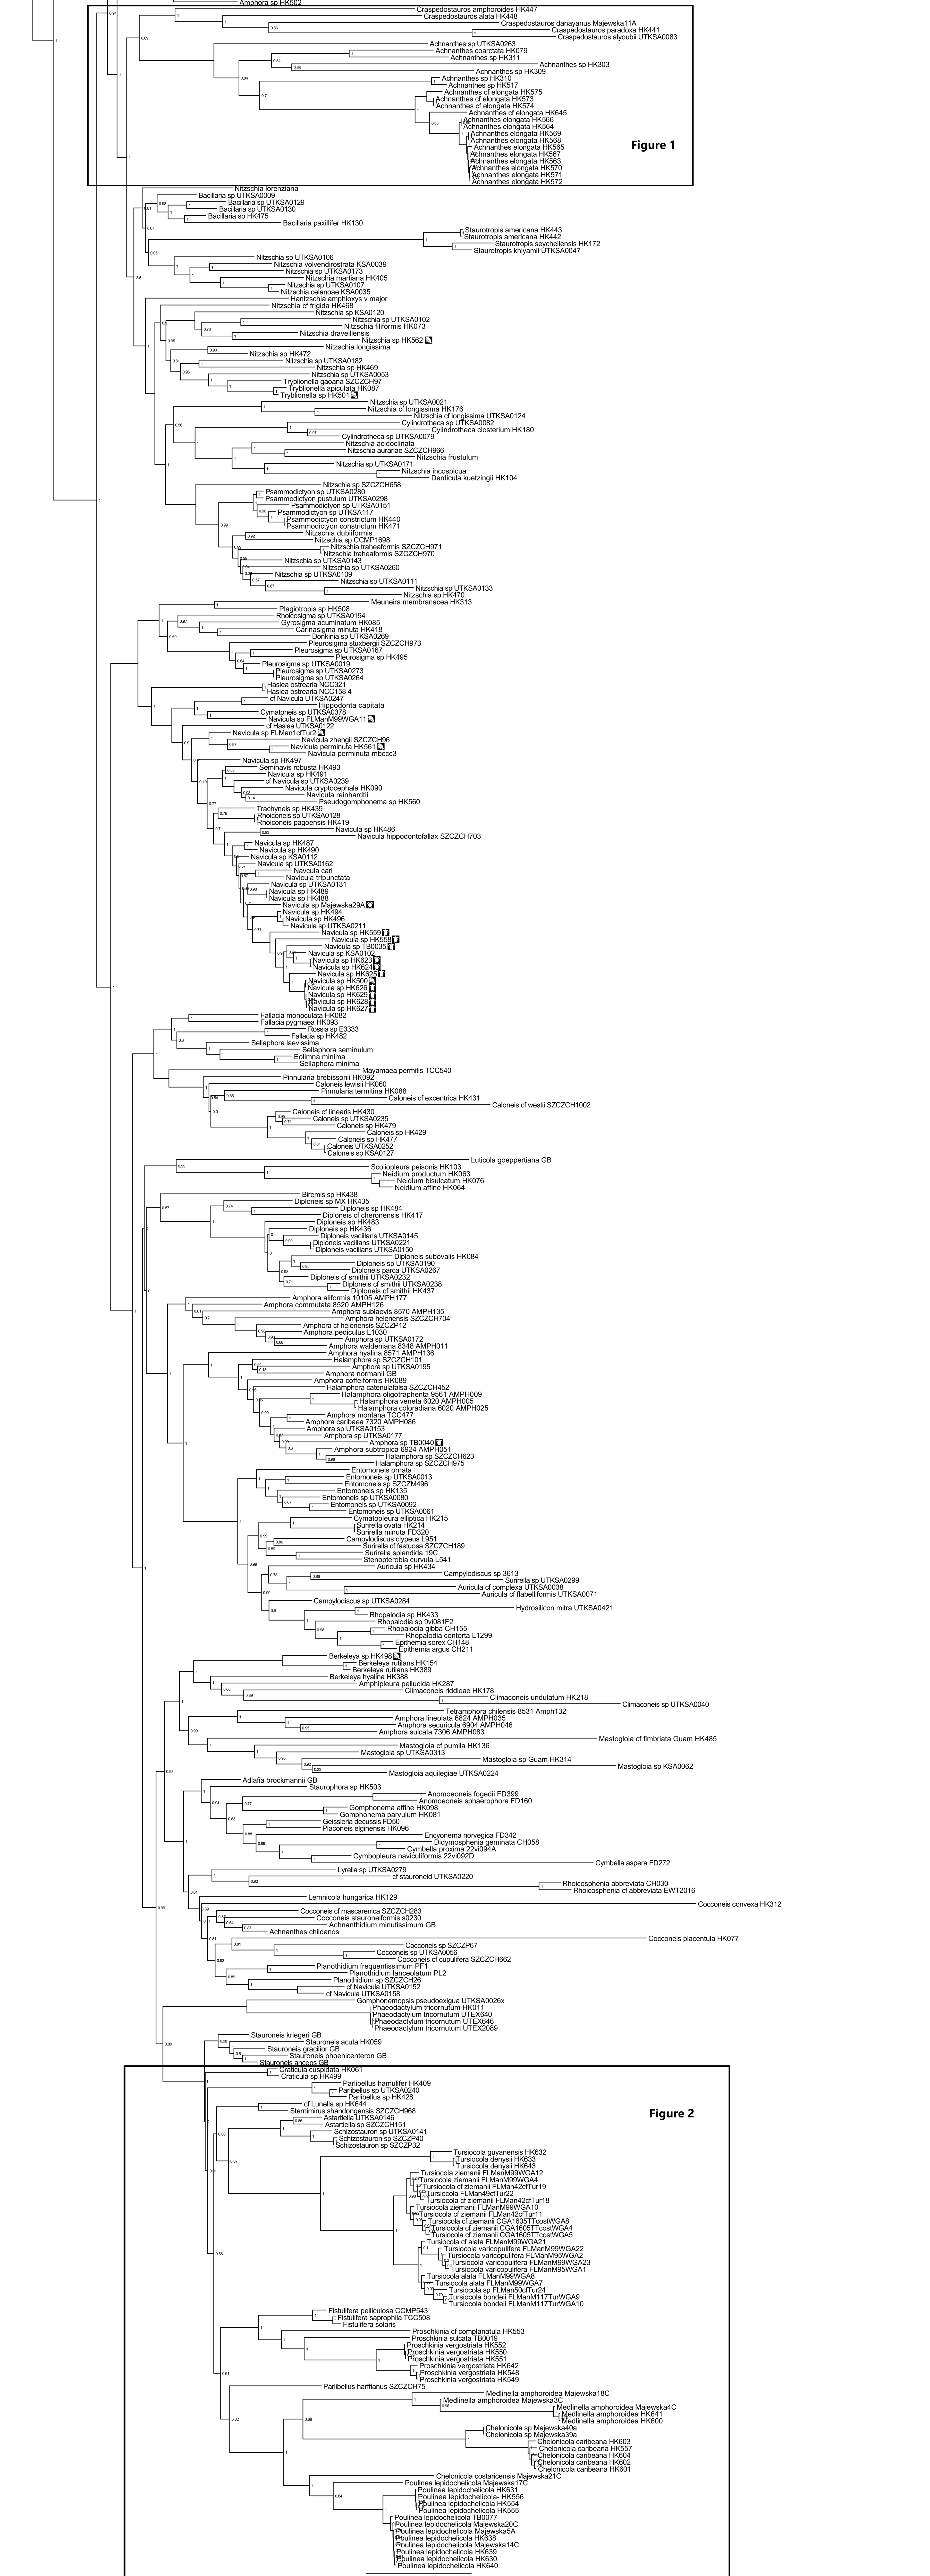

Supplement: 41598_2022_19064_MOESM2_ESM.pdf [file 41598_2022_19064_MOESM2_ESM.pdf]
